1 **Title: Induced illusory body ownership in Borderline Personality Disorder**

2  
3 **Authors:** Eli S. Neustadter\*1,2+, Sarah K. Fineberg\*1, Jacob Leavitt 3, Meagan M. Carr 1,4,  
4 Philip R. Corlett 1

5 \*These authors contributed equally to this work.

6 + Corresponding author

7 1 Yale University Department of Psychiatry

8 2 Yale School of Medicine

9 3 University of Houston Department of Psychology

10 4 Eastern Michigan State University Department of Psychology

11

12 **Funding Sources:**

13 This work was supported by the Yale School of Medicine Medical Student Research Fellowship  
14 (to ESN), the National Institutes of Mental Health Grant No. 5T32MH019961 (to SKF), a  
15 National Alliance for Research on Schizophrenia and Depression Young Investigator Award  
16 (NARSAD) from the Brain and Behavior Research Foundation (to SKF), an International Mental  
17 Health Research Organization/Janssen Rising Star Translational Research Award (to PRC), a  
18 Clinical and Translational Science Award Grant No. UL1TR000142 from the National Center for  
19 Research Resources and the National Center for Advancing Translational Science, components  
20 of the National Institutes of Health and the National Institutes of Health Roadmap for Medical  
21 Research (to PRC), and the National Institutes of Mental Health Grant No. R01MH112887 (to  
22 PRC). This work was funded in part by the State of Connecticut, Department of Mental Health  
23 and Addiction Services. This publication does not express the views of the NIH, the Department  
24 of Mental Health and Addiction Services or the State of Connecticut, or other funding agencies.  
25 The views and opinions expressed are those of the authors.

26

27 **Acknowledgements:**

28 We would like to thank Ada Umuego for her help creating figures. We also thank our research  
29 participants.

30

31 **Keywords:** Rubber Hand Illusion, Borderline Personality Disorder, Body Ownership,  
32 Psychoticism, predictive coding, self

33

34 **Abstract word count:** 261

35

36 **Main Text Word Count:** 5512

37

38 **Supplement Word Count:** 820

39

40 **Figures:** 3

41

42 **Tables:** 3

43

44

45 **Corresponding author:** [eli.neustadter@yale.edu](mailto:eli.neustadter@yale.edu)

46 **Abstract**

47 **Background:** One aspect of selfhood that may have relevance for Borderline Personality  
48 Disorder (BPD) is variation in sense of body ownership. We employed the rubber hand illusion  
49 (RHI) to manipulate sense of body ownership in BPD. We extended previous research on  
50 illusory body ownership in BPD by testing: 1) two illusion conditions: asynchronous &  
51 synchronous stimulation, 2) relationship between Illusion experience and core BPD symptoms,  
52 and 3) relationship between illusion experience maladaptive personality traits.  
53

54 **Methods:** Participants (24 BPD, 21 control) underwent RHI procedures. We measured illusion  
55 strength (questionnaire responses), proprioceptive drift (perceived shift in physical hand  
56 position), BPD symptoms (DIB-R score), and maladaptive personality traits (PID-5).  
57

58 **Results:** For subjective illusion strength, we found a main effect of group (BPD > HC,  $F = 11.94$   
59  $p = 0.001$ ), and condition (synchronous > asynchronous,  $F(1,43) = 22.80$ ,  $p < 0.001$ ). There was  
60 a group x condition interaction for proprioceptive drift ( $F(1,43) = 6.48$ ,  $p = 0.015$ ) such that  
61 people with BPD maintained illusion susceptibility in the asynchronous condition. Borderline  
62 symptom severity correlated with illusion strength within the BPD group, and this effect was  
63 specific to affective symptoms ( $r = 0.481$ ,  $p < 0.01$ ). Across all participants, trait psychoticism  
64 correlated with illusion strength ( $r = 0.481$ ,  $p < 0.01$ ).  
65

66 **Conclusion:** People with BPD are more susceptible to illusory body ownership than are healthy  
67 controls. This result is consistent with the robust clinical literature describing aberrant physical  
68 and emotional experience of self in BPD. A predictive coding interpretation of these results  
69 holds promise to develop testable mechanistic hypotheses for experiences of disrupted bodily  
70 self in BPD.  
71

72

73

74

75

76

77

78

79

## 80 **1. Introduction**

### 81 *1.1. The embodied self in Borderline Personality Disorder*

#### 82 *1.1.1. Self-disturbance is a core feature of BPD*

83 Aberrations of self-experience and identity are considered a core symptoms of  
84 Borderline Personality Disorder (BPD) [1]. Self-disturbance is characterized by a markedly  
85 persistent unstable sense of self that can be realized by dramatic shifts in self-image, shifting  
86 goals and values, and feelings of emptiness, dissociation, and non-existence [2, 3]. These  
87 experiences are distressing and dangerous; in a qualitative study, Brown et al. [4] found that  
88 more than 50% of women with BPD and history of self-harm endorsed disturbances in self-  
89 experience, such as emptiness, numbness, or feeling dead, as reasons for non-suicidal self-  
90 injury .

91

#### 92 *1.1.2. Bodily experience is disrupted in BPD*

93 One aspect of selfhood that may have relevance for pathologies of self in BPD is the experience  
94 of body ownership. Indeed, abnormal bodily experiences in BPD are common, including bodily  
95 dissociation [5], altered pain perception [6], and deficits in interoception (the awareness and  
96 processing of internal bodily signals) [7].

97 Mechanistically, sense of body ownership is constituted by integration of sensorimotor  
98 (external) and interoceptive (internal) signals [8]. Neural computations on these signals  
99 generate a probabilistic, and therefore malleable, model of self-representation [9]. For a healthy  
100 person, sense of body ownership is stable and taken for granted, while in certain mental  
101 disorders such as BPD, sense of body ownership may be more variable and plastic.  
102 Experimental paradigms that directly manipulate the experience of body ownership have the  
103 potential to elucidate aberrations in embodied self-experience in BPD.

104

105

106

107 *1.2. Probing the embodied self: The Rubber Hand Illusion*

108 Illusions can test the plasticity of body ownership by manipulating integration of self and  
109 non-self stimuli. One paradigmatic body illusion is the Rubber Hand Illusion (RHI) [10]. During  
110 the task, a participant's hidden hand is stroked in synchrony with an appropriately positioned  
111 and visible rubber hand (**Figure 1**). The RHI can induce the feelings that the rubber hand  
112 belongs to the participant (subjective illusion) and that the participant's own hand has moved  
113 toward the rubber hand (proprioceptive drift). Typically, the RHI is measured by a self-report  
114 questionnaire of illusory experience (adapted from [10]) and the spatial magnitude of  
115 proprioceptive drift [11].

116 It is theorized that the RHI results from the multimodal (e.g. visuo-tactile) integration of  
117 sensory events in peri-personal space: an area including and immediately surrounding the body  
118 that is implicated in maintaining a dynamic cortical representation of the body [12]. RHI  
119 induction is sensitive to visuospatial plausibility and the timing of sensory stimulation, such that  
120 unrealistic placement of the rubber hand and temporally asynchronous stroking have been  
121 found to attenuate illusory body ownership in healthy participants [13, 14].

122 Eshkevari et al. [15] highlight two factors that promote induction of the rubber illusion.  
123 One factor, "visual capture," occurs prior to visuo-tactile stimulation, whereby a sense of body  
124 ownership results from over-weighting of the visual stimulus of the rubber hand over  
125 proprioceptive information of the real hand. The other factor, which entails simultaneous seen  
126 and felt touch of the fake and real hand during simultaneous stroking, results in the illusion of  
127 rubber hand ownership via the multisensory integration of temporally co-occurring visual and  
128 tactile stimulation. Empirical data from healthy participants and computational modelling of  
129 rubber hand ownership demonstrate that the illusion can occur without tactile stimulation (first  
130 factor) and is enhanced by temporally synchronous (vs. asynchronous) stroking of fake and real  
131 hands [16]. Importantly, increased susceptibility to the first factor, which occurs in both

132 synchronous and asynchronous conditions (as it occurs prior to tactile stimulation) may indicate  
133 imprecise bodily representations that result in the overweighting of exteroceptive information  
134 [16] [15].

135

### 136 *1.3. Pathologies of illusory body ownership*

137 The RHI has been conducted across a range of mental disorders in which anomalous  
138 self-experience has been implicated and which share clinical overlap with BPD, including  
139 schizophrenia [11], body dysmorphic disorder [17], and eating disorders [15, 18]. These  
140 conditions are associated with increased susceptibility to the RHI as measured by self-report  
141 questionnaire [18], proprioceptive drift [17] or both [11, 15]. Increases in subjective measures of  
142 the illusion and proprioceptive drift have also been demonstrated in pharmacological models of  
143 psychosis (i.e. ketamine) in healthy participants, implicating NMDA hypofunction and  
144 augmented neural oscillations in the gamma-range that promote cross-modal binding [13]. This  
145 interpretation was bolstered by the finding of maintained illusory experience in an asynchronous  
146 version of the RHI with pharmacologic challenge, highlighting the methodological importance of  
147 administering the task in both synchronous and asynchronous versions.

148 The vividness of the illusion has also been linked to schizotypy in healthy participants  
149 [19], suggesting that altered body ownership may be a marker of psychosis-proneness.  
150 However, the interpretation of these results is limited as task demand characteristics of the  
151 illusion questionnaire may not have been controlled for. In particular, the original Botvinick &  
152 Cohen [10] questionnaire was designed to include target and non-target items to control for  
153 suggestibility, but to our knowledge no clinical study has adequately assessed group differences  
154 in the relative endorsement of target and non-target items on the RHI questionnaire.  
155 Furthermore, target items (which probe the illusions of touch, causality, and ownership,  
156 respectively) sequentially probe qualitatively more encompassing aspects of the illusion. For  
157 example, people who minimally experience the illusion may only endorse the illusion of touch

158 (feeling the touch on the location where the rubber hand is touched), while those who  
159 experience a stronger illusory experience may also endorse ownership of the rubber hand (that  
160 the rubber hand is their hand). However, differences in the relative endorsement of individual  
161 target items, both between and across clinical groups, has not been previously directly  
162 tested. Close examination of target item responses and attention to dimensional symptomology  
163 can reveal trait markers across diagnostic thresholds that may influence illusion susceptibility.

164

#### 165 *1.4. The current study: Probing body plasticity in BPD*

166 To date, there has been one study examining illusory body ownership using the RHI in  
167 people with current and remitted BPD [20]. That study analyzed findings in a synchronous  
168 version of the task only, and found increased subjective experience of the illusion, but similar  
169 proprioceptive drift, in people with BPD compared to HCs. However, group differences in the  
170 relative endorsement of target and non-target items was not accounted for. Additionally, the  
171 authors found a small but significant correlation between illusory body ownership and state and  
172 trait dissociation after controlling for BPD symptom severity. We extend these findings by (1)  
173 testing group differences in the relative endorsement of target vs. non-target items, (2) probing  
174 responses to individual target items to explore more granular group differences in illusory  
175 experience, (3) directly testing hypotheses about asynchronous stimulation, and (4) exploring  
176 relationships between illusory body ownership and BPD symptom phenotypes and dimensional  
177 measures of maladaptive personality.

178 In the current study, we conducted the RHI task with people with BPD and healthy  
179 controls (HC) in temporally synchronous and asynchronous conditions. We made the following  
180 hypotheses:

181

182

183 **H1. Illusion strength would be greater in BPD vs HC groups in both synchronous and**  
184 **asynchronous conditions.**

185 *We hypothesized that people with BPD would be more susceptible to the illusion as measured*  
186 *by both subjective questionnaire responses (H1.1) and proprioceptive drift (H1.2). This*  
187 *difference has been observed most strongly in synchronous condition in other settings;*  
188 *however, some increase in susceptibility in clinical groups has also been observed in the*  
189 *asynchronous condition. We are the first to report asynchronous condition results in BPD.*

190  
191 **H2.1. Tactile illusion strength would be greater than ownership illusion strength.**

192 **H2.2. The illusion of ownership, but not the illusions of perception or causality, will be**  
193 **more strongly endorsed in BPD than in HC.**

194 *Some RHI studies descriptively report differential endorsement of target questions: Q1 (tactile*  
195 *illusion) versus Q2 (causality), Q3 (ownership), however these differences have not been*  
196 *directly tested. Given self-disturbance in BPD, we hypothesized that pair-wise comparisons of*  
197 *target-item endorsement would reveal specific increased endorsement of Q3 in BPD vs HC*  
198 *across conditions.*

199 **H3 (exploratory). Illusion strength would positively correlate to psychotic-like symptoms**  
200 **and traits.**

201 *In BPD, cognitive-perceptual disturbances are common, and psychotic-like traits are present in*  
202 *undiagnosed people in the general population. Given previous work linking RHI illusion strength*  
203 *to ketamine intoxication, psychosis, and schizotypy, we explored correlation of RHI illusion*  
204 *strength to psychotic-like experiences in BPD and HC, as well as BPD symptom clusters in BPD*  
205 *group.*

206  
207  
208 **2. Methods**

209 **2.1. Subjects**

210 This study was approved by the Yale Institutional Review Board. Results for this study  
211 were collected as part of a larger battery of experimental tasks. Results from those tasks as well  
212 as the recruitment strategy for these participants are described in detail elsewhere [21, 22].  
213 Briefly, women aged 18-65 were recruited from the community. HCs had no current psychiatric  
214 conditions, and BPD participants had no current substance dependence and no primary  
215 psychotic disorder according to intake interview assessment (see **supplement 1**).

216

### 217 *2.2. Symptom and self-report scales*

218 HC and BPD participants completed a series of well validated self-report symptom  
219 scales and structured clinical interviews including: the Beck Anxiety Inventory (BAI) [23], Beck  
220 Depression Inventory (BDI-II) [24], The Personality Inventory for DSM-5 (PID-5) [25], The  
221 Structured Clinical Interview for DSM-IV Personality Questionnaire [26], and the Revised  
222 Diagnostic Interview for Borderlines (DIB-R) [27]. Please refer to **supplement 2** for information  
223 on scale validation and subscales.

224

### 225 *2.3. Rubber hand illusion paradigm*

226 Participants wore a non-latex glove on their right hand, sat in front of a table, and placed  
227 their right hand into an open cardboard box (**Figure 1**). All participants underwent RHI  
228 procedures on their right hand only as it was previously demonstrated that laterality and  
229 handedness had no effect on the subjective experience of the illusion or magnitude of  
230 proprioceptive drift, the two main outcomes measures for the task in the current study [28].

231 In the box, the participant's right hand was occluded from their view, but not from the  
232 view of the experimenter who sat across the table facing the participant. A gloved life-sized  
233 rubber hand was positioned so that the hand was visible to the participant on the medial end of



234 the box. A cloth was then draped over the participant's shoulder covering both the real right arm  
235 and the arm of the rubber hand.

236 Before induction of the illusion, participants made an initial estimate of the spatial  
237 location on their occluded right hand via a numbered ruler that was placed on top of the box.  
238 Each participant then underwent synchronous and asynchronous versions of the task, each  
239 lasting 3 minutes. In the synchronous condition, an experimenter used the brush of a paintbrush  
240 to provide soft simultaneous touch at 1 Hz frequency in the proximal to distal direction along the  
241 middle phalanges of the real index finger and an equivalent location on the rubber hand.  
242 Procedures for the asynchronous condition were identical except that brush strokes were offset  
243 in time by 0.5 seconds (resulting in alternating touch on the real and rubber hands).

244

#### 245 *2.3.1. Measure of subjective experience of the illusion*

246 After synchronous and asynchronous conditions, participants completed a questionnaire  
247 adapted from Botvinick & Cohen [10] to assess their subjective experience of the illusion (**Table**  
248 **1**). Variations of this questionnaire have been used widely in RHI research [17]. Similar to  
249 previous studies, the first three items ("target") were used to create an index score as they are  
250 more strongly and consistently endorsed than the other items, and they reflect expected illusory  
251 experience [17]. The remaining items ("non-target") have historically been included to control for  
252 suggestibility and task demand characteristics as they are endorsed only minimally by healthy  
253 samples [17]. However, they are often endorsed in clinical psychiatric populations and during  
254 pharmacologic challenge (e.g. ketamine) [13]. For each condition, a cumulative "target item"  
255 score was created as the average rating across items 1-3 and a cumulative "non-target item"  
256 score was created as the average rating across items 4-9. Significantly higher target scores  
257 compared to non-target scores was used as an indicator of successful induction of the illusion.

258

#### 259 *2.3.2. Measure of proprioceptive drift*

260 Proprioceptive drift refers to the extent to which participants estimated their hand as  
261 being closer to the rubber hand after induction of the illusion. Participants estimated the position  
262 of their hidden right index finger before stimulation, and then at 30 second intervals during  
263 stimulations (6 times over 3 minutes of stimulation) by referring to a numbered ruler placed on  
264 top of the box. At each interval, participants were reminded not to move their hand. At each  
265 interval, the position of the ruler was jittered to prevent participants from anchoring on previous  
266 estimates [29]. Proprioceptive drift was calculated as the difference in estimated hand location  
267 between the pre-trial estimate and average of the six post-trial estimates. Positive values, then,  
268 refer to post-trial estimates that are closer to rubber hand than initial estimates. Positive drift  
269 values are consistent with successful induction of the illusion.

270

#### 271 *2.4. Planned statistical analyses:*

272 Parametric tests were conducted for analyses on main outcome variables (subjective  
273 experience questionnaire and proprioceptive drift) as values for skewness and kurtosis were all  
274 within -2 to 2, indicating normal univariate distribution [30].

275 To test for successful induction of the illusion in each group, we conducted a 2 x 2  
276 analysis of variance ANOVA to compare the effects of condition (synchronous vs.  
277 asynchronous) and item-type (target vs. non-target) on subjective endorsement of the illusion.

278 Separate 2 x 2 ANOVAs were used to assess impact of group (HC vs. BPD) and  
279 condition (synchronous vs. asynchronous) on target item endorsement (hypothesis H1.1) and  
280 proprioceptive drift (hypothesis H1.2). ANOVAs were further explored with post-hoc t-tests. To  
281 assess for specificity of target versus non-target item endorsement, we performed a one-way  
282 ANCOVA to assess for group differences (HC vs. BPD) in target item endorsement using non-  
283 target item endorsement as a covariate.

284 Repeated measures ANOVA test (2 group x 2 condition x 3 target items) was employed  
285 to test for differential endorsement of individual target items (hypothesis H2.1 and H2.2).

286           Lastly, we performed Pearson correlations to explore the relationships between RHI  
287 measures and symptom scales. Correlations were one-tailed unless stated otherwise to test for  
288 positive correlations (hypothesis H3).

289           Alpha values were set to 0.05 for primary analyses and, more conservatively, to 0.01 for  
290 post-hoc analyses and correlations. We report effect sizes using Cohen's D for t-tests, and  
291 partial eta squared for ANOVAs.

292

### 293 **3. Results**

#### 294 3.1. Participant characteristics

295           Twenty-four women were enrolled in the BPD group and 21 women were enrolled in the  
296 HC group. HC and BPD groups were matched on age, years of education, and race (**Table 2**).  
297 The BPD group was significantly more symptomatic on measures of BPD symptom severity  
298 (SCID-II, BSL, DIB-R), depression (BDI), and anxiety (BAI) (**Table 2**).

299

#### 300 3.2. *Induction of illusory limb ownership*

301           In both BPD and HC groups, target items were endorsed more strongly than non-target  
302 items in the synchronous condition. Furthermore, target items were more strongly endorsed in  
303 the synchronous condition compared to asynchronous condition (see **supplement 3** for  
304 statistics) Taken together, these results suggest that we were able to successfully induce the  
305 RHI in BPD and HC groups.

306

#### 307 3.3. *Self-Report RHI Questionnaire*

308 *H1.1. Subjective illusion strength would be greater in BPD vs HC groups in both synchronous*  
309 *and asynchronous conditions.*

310 To test hypothesis H1.1, we tested for group differences in mean target item  
311 endorsement using a 2 group x 2 condition repeated measures ANOVA (**Figure 2A, 2B**). We  
312 found a significant main effect of group (BPD > HC,  $F(1,43) = 11.94$ ,  $p = 0.001$ ,  $\eta^2 = 0.22$ ) and of  
313 task condition (synchronous > asynchronous,  $F(1,43) = 22.80$ ,  $p < 0.001$ ,  $\eta^2 = 0.35$ ). No  
314 significant interaction was found ( $F(1,43) = 1.72$ ,  $p = 0.681$ ,  $\eta^2 < 0.01$ ).

315 To determine whether group differences in target item endorsement in the illusion  
316 inducing condition (synchronous) could be accounted for by task demand characteristics or  
317 suggestibility, we conducted a one-way ANCOVA to test for a difference between BPD and HC  
318 groups in target item endorsement while controlling for responses to non-target items. We found  
319 that the effect of group remained significant when we controlled for the non-target items ( $F(1,42)$   
320  $= 4.40$ ,  $p = 0.042$ ,  $\eta^2 < 0.1$ ) suggesting that group differences in target item responses do reflect  
321 differences in the magnitude of illusory experience.

322

323 *H2.1. Tactile illusion strength would be greater than ownership illusion strength.*

324 *H2.2. Greater subjective illusion in BPD would be accounted for by ownership illusion.*

325 To test hypotheses H2.1 and H2.2, we conducted a repeated-measures ANOVA (2 groups x 2  
326 conditions x 3 target items) (**Figure 2C, 2D**). We found a main effect of group ( $F(1,43) = 11.94$ ,  
327  $p = 0.001$ ,  $\eta^2 = 0.22$ ), condition ( $F(1,43) = 22.80$ ,  $p < 0.001$ ,  $\eta^2 = 0.35$ ), and target item ( $F(1,43)$   
328  $= 26.16$ ,  $p < 0.001$ ,  $\eta^2 = 0.38$ ). While condition x group, item x group, and condition x item  
329 interactions were non-significant, we found a significant group x item x condition interaction  
330 ( $F(1,43) = 4.89$ ,  $p = 0.032$ ,  $\eta^2 = 0.10$ ). Post-hoc tests to unpack this 3-way interaction revealed  
331 that pair-wise comparison between Q1 and Q2 in the synchronous condition is significant in the  
332 control but not BPD group (control:  $t(20) = 3.12$ ,  $p = 0.005$ ,  $d = 0.68$ ; BPD:  $t(23) = 1.75$ ,  $p =$   
333  $0.094$ ,  $d = 0.36$ ). Other pairwise comparisons did not differ significantly by group.

334 To examine hypothesis H2.1, we conducted post-hoc t-tests comparing Q1 (tactile  
335 illusion) and Q3 (ownership illusion) in each condition. In all participants taken together, Q1 was

336 more strongly endorsed than Q3 in both conditions (synchronous:  $t(44) = 4.17$ ,  $p < 0.001$ ,  $d =$   
337  $0.63$ ; asynchronous:  $t(44) = 4.79$ ,  $p < 0.001$ ,  $d = 0.72$ ). Of note, Q2 and Q3 were endorsed  
338 comparably across conditions (Synchronous:  $t(44) = 1.61$ ,  $p = 0.114$ ,  $d = 0.24$ ; Asynchronous:  
339  $t(44) = 0.87$ ,  $p = 0.39$ ,  $d = 0.13$ ). This suggests that the illusion of touch (i.e. feeling the touch on  
340 the rubber hand) was more easily induced by the RHI, while illusions of causality (i.e. felt touch  
341 was caused by touch on rubber hand) and ownership (“I felt as if the rubber hand were mine”)  
342 indicate more severe body illusion experiences that are more difficult to induce.

343 To examine hypothesis 2.2, we conducted post-hoc t-tests comparing group differences  
344 in individual target item endorsement. In the synchronous condition, BPD and HC groups  
345 comparably endorsed Q1 ( $t(43) = 1.59$ ,  $p = 0.120$ ,  $d = 0.48$ ). Compared to HC, BPD endorsed  
346 Q2 ( $t(43) = 2.58$ ,  $p = 0.013$ ,  $d = 0.77$ ) and Q3 more strongly ( $t(43) = 2.48$ ,  $p = 0.017$ ,  $d = 0.74$ );  
347 however, these differences did not achieve statistical significance at  $\alpha = 0.01$ . In the  
348 asynchronous condition, BPD endorsed Q1 more strongly ( $t(43) = 2.77$ ,  $p = 0.009$ ,  $d = 0.83$ )  
349 compared to HC. Additionally, BPD endorsed Q2 more strongly, ( $t(43) = 2.34$ ,  $p = 0.025$ ,  $d =$   
350  $0.70$ ), but not at the statistical significance level of  $\alpha = 0.01$ . Lastly, BPD and HC endorsed  
351 illusion of ownership at comparable levels  $t(43) = 1.21$ ,  $p = 0.233$ ,  $d = 0.36$ ) in the asynchronous  
352 condition. In summary, contrary to our hypothesis, group differences in target item endorsement  
353 appear to be driven by different items in synchronous and asynchronous conditions. While in the  
354 synchronous condition group differences appear to be driven by differential endorsement of Q2  
355 (illusion of causality) and Q3 (illusion of ownership), in the asynchronous condition, they are  
356 accounted for by differential endorsement of Q1 (tactile illusion) and, to a lesser extent, by Q2  
357 (illusion of causality).

358

### 359 *3.4. Proprioceptive Drift*

360 *H1.2. Proprioceptive illusion strength would be greater in BPD vs HC groups in both*  
361 *synchronous and asynchronous conditions.*

362 To test hypothesis H1.2., we explored group differences in proprioceptive drift using 2 x  
363 2 repeated measures ANOVA (group x condition) (**Figure 3**). Main effect of group (BPD vs HC,  
364  $F(1,43) < 0.001$ ,  $p = 0.99$ ,  $\eta^2 < 0.01$ ) and of task condition (synchronous vs asynchronous,  $F(1,$   
365  $43) = 2.19$   $p = 0.15$ ,  $\eta^2 = 0.05$ ) were not significant. However, a significant group x condition  
366 interaction was found ( $F(1,43) = 6.48$ ,  $p = 0.015$ ,  $\eta^2 = 0.13$ ). Post hoc paired sample T-tests  
367 demonstrated that, contrary to our hypothesis, while the HC group had significantly reduced  
368 proprioceptive drift in the asynchronous condition ( $t(20) = 2.90$ ,  $p = 0.009$ ,  $d = 0.63$ ), the BPD  
369 group had no significant difference in drift across conditions ( $t(23) = 0.75$ ,  $p = 0.462$ ,  $d = 0.094$ )  
370 (**Figure 3**). We also found weak to moderate relationships between target item endorsement  
371 and proprioceptive drift that did not meet our significance cut-off of  $p < 0.01$  (see **supplement**  
372 **4**).

373

### 374 3.5. Symptom/Trait Correlations

375 *H3. Exploratory: Illusion strength would positively correlate to psychotic-like symptoms and*  
376 *traits.*

#### 377 3.5.1. BPD symptoms

378 We investigated whether BPD symptom severity and BPD symptom clusters relate to  
379 illusion strength in the clinical group. To do so, we conducted one-tailed Pearson correlations  
380 between DIB total (unscaled score) and subscale (affect, cognition, impulsivity, and  
381 interpersonal relationship sections) scores (unscaled) and the following RHI measures: target-  
382 item score, item-3 (“I felt as if the rubber hand was my hand”) and proprioceptive drift in the  
383 synchronous condition (statistics in **Table 3**). We limited correlations to the synchronous  
384 condition to limit multiple comparisons and to focus on the more illusion-inducing condition. At  
385 the  $\alpha = 0.01$  level, we found that target-item index score and item-3 endorsement were related  
386 to the affect subscales with correlations in the large effect range. Proprioceptive drift was not  
387 related to BPD symptom severity or symptom clusters within the clinical group.

388

389 *3.5.2. Dimensional personality assessment*

390 Next, we examined the relationship between RHI and dimensional measures of  
391 maladaptive personality traits across all participants. To do so, we conducted one-tailed  
392 Pearson correlations between PID-5 personality trait domains (negative affect, detachment,  
393 antagonism, disinhibition, and psychoticism) and the following RHI measures: target-item score,  
394 item-3 (“I felt as if the rubber hand was my hand”) and proprioceptive drift in the synchronous  
395 condition (**Table 3**). At the  $\alpha = 0.01$  level, only trait-psychoticism was significantly related to the  
396 target-item index score and item-3 endorsement, with correlations observed in the medium-  
397 effect range. Proprioceptive drift was not significantly related to clinical traits at the  $p < 0.01$   
398 level.

399 Of note, six participants (four BPD and two HC) did not complete the PID-5. The two HC  
400 participants were comparable to other HCs in age, education, BDI, BAI and RHI outcomes. The  
401 four BPD participants were both highly symptomatic and appeared to have higher target item  
402 endorsement in the synchronous condition. Thus, these results likely underestimate the  
403 correlation between maladaptive traits and subjective response to the illusion. Note that the  
404 very small sample size was prohibitive of inferential statistics.

405

406 **4. Discussion**

407 To our knowledge, this is the second study investigating illusory body ownership in BPD.  
408 We extend the previous report by directly assessing findings in the asynchronous condition,  
409 analyzing differential endorsement of self-report items, and identifying further associations with  
410 clinical and personality trait variables. In the paragraphs to follow, we will interpret RHI behavior  
411 in BPD within a predictive coding account of bodily self [31, 32], which posits that  
412 representations self are probabilistically generated through integration of top-down predictions

413 about the body and bottom-up “prediction errors” of sensory inputs across interoceptive and  
414 exteroceptive domains.

415 We hypothesized that compared to HC, people with BPD would have greater target item  
416 endorsement (H1.1) and larger proprioceptive drift (H1.2) in both synchronous and  
417 asynchronous conditions. H1.1 was supported: BPD had greater target item endorsement in  
418 both conditions. Contrary to H1.2, we found a significant group x condition interaction on drift  
419 measurements: BPD and HC had comparable drift during synchronous stimulation. However,  
420 during asynchronous stimulation, BPD had maintained drift while HC had significantly reduced  
421 drift.

422 As hypothesized, we found increased body plasticity in BPD as measured by subjective  
423 endorsement of illusory experience. Bekrater-Bodmann et al. [20] reported increased subjective  
424 experience of the illusion; we clarified this finding by demonstrating that this group difference  
425 remained significant after controlling for the endorsement of non-target items, suggesting that  
426 increased target item response reflects alterations in the magnitude of illusory experience. We  
427 also extend their findings by demonstrating increased susceptibility in both synchronous *and*  
428 *asynchronous* conditions, indicating that illusion susceptibility occurs generally, rather than  
429 specifically during synchronous stimulation. While Bekrater-Bodmann et al. [20] employed  
430 asynchronous stimulation merely as a manipulation check, others have compared RHI results  
431 across conditions (e.g. [13, 15, 17]) to elucidate possible mechanisms underlying abnormalities  
432 in illusory body ownership. For example, Morgan et al. [13] found maintained illusory experience  
433 from synchronous to asynchronous stimulation during ketamine (an NMDA antagonist)  
434 challenge in healthy participants. NMDA antagonism (a model for early psychotic illness) is  
435 thought to weaken top-down signaling, leading to over-weighting of bottom-up input, even when  
436 the bottom-up signals are inconsistent. In the asynchronous RHI condition (a state of  
437 inconsistent bottom-up signals), the weaker top-down signaling produces a large prediction



438 error regarding self-attribution, putatively resulting in illusion experience. In BPD, illusion  
439 susceptibility across synchronous and asynchronous conditions may similarly indicate weak top-  
440 down signaling regarding body-ownership.

441 RHI induction is hypothesized to arise from two processes [15]: 1) visual capture, which  
442 occurs prior to tactile stimulation, whereby rubber hand ownership is experienced via integration  
443 of visual and proprioceptive inputs of the fake and real hands, respectively; and 2), temporal  
444 integration of visual and tactile input during synchronous stroking. Studying RHI in eating  
445 disorders, Eshkevari et al. [15] interpreted maintained illusion susceptibility in asynchronous  
446 conditions as a heightened sensitivity to visual capture over distorted bodily signals. This  
447 interpretation was bolstered by the finding that interoceptive deficits were a significant predictors  
448 of illusory body ownership in ED. Importantly, interoception (i.e. the processing and awareness  
449 of internal bodily signals) is theorized as a central modality in stabilizing mental representations  
450 of bodily-self in predictive coding frameworks (e.g.[8, 32, 33]). Accordingly, the precision  
451 associated with prediction error of sensory input—the confidence or uncertainty ascribed to it—  
452 modulates the integration of bottom-up and top-down information flow, such that low precision-  
453 weighted prediction errors are less likely to update (top-down) prior beliefs. In the RHI, the  
454 stability of body ownership is maintained by the relative precision of interoceptive vs  
455 exteroceptive input. Reduced certainty, or “trustworthiness,” ascribed to interoceptive signals  
456 leads to the overweighting of exteroceptive input (e.g. seeing the rubber hand) during the task,  
457 resulting in increased susceptibility to the illusion (see [34] for empirical support). BPD is  
458 associated with deficits in interoceptive processing [35]. However, the relationship between  
459 interoception and body plasticity was not directly assessed in this study. Future research can  
460 assess the extent to which interoceptive processing, e.g. as measured by heart beat evoked  
461 potentials [35, 36], or heart beat detection [37], though see [38] for methodological limitations),  
462 mediates illusory body ownership in BPD and serves as a common mechanism of illusion

463 susceptibility across personality, eating, and body-image disorders, for which there are  
464 symptomatic and clinical overlap [39, 40].

465         Contrary to H1.2, we found that BPD had comparable drift in both task conditions, while  
466 HC had significantly reduced drift in the asynchronous condition. While in previous studies, drift  
467 has been used as a “behavioral proxy” of rubber hand ownership (e.g. [41, 42]), Rohde, Di Luca  
468 and Ernst [43] found subjective endorsement of the illusion and drift to be separate and  
469 dissociable phenomena. In our sample, drift magnitude did not correlate with endorsement of  
470 RHI questionnaire items. Interestingly, Kaplan et al. [17] found that individuals with body  
471 dysmorphic disorder (BDD) demonstrate similar findings to our BPD sample such that they  
472 evidenced comparable drift in both conditions. They interpret this result in light of findings in  
473 healthy participants [43], that proprioceptive drift occurs to an equal extent during synchronous  
474 stroking and in a “just vision” condition (wherein participants estimate hand location after looking  
475 at rubber hand without tactile stimulation), while asynchronous stroking reduces drift by  
476 disrupting visio-proprioceptive integration. Kaplan et al. [17] posit that with regards to bodily  
477 awareness, people with BDD are less susceptible to the illusion-extinguishing effects of the  
478 asynchronous condition. If BPD shares a similar mechanism underlying maintained drift across  
479 conditions with BDD, this would be consistent with our proposed BPD self-model that is biased  
480 towards incorporating (even inconsistent) exteroceptive information in the setting of  
481 interoceptive deficits.

482         To our knowledge, differential endorsement of target-items has never been directly  
483 studied. Taking a closer look at responses to the RHI questionnaire, we hypothesized that the  
484 illusion of perception (Q1) would be more strongly endorsed than the illusion of ownership (Q3)  
485 (H2.1), and that greater subjective illusion strength in BPD would be accounted for by the  
486 illusion of ownership (H2.2). H2.1 was supported: across groups and conditions, Q1 (illusion of  
487 perception) was more strongly endorsed than Q3 (illusion of ownership). Contrary to H2.2., we  
488 found that group differences in target-item endorsement were driven by different questions in

489 both conditions. H2.1 confirms our common-sense assumption that a tactile illusion is more  
490 easily inducible than the illusion of rubber hand ownership. Considering target item  
491 endorsement in the synchronous condition, we found comparable endorsement of Q1, but  
492 differential endorsement of Q2 and Q3 across groups, suggesting that similar perceptual  
493 experiences led to differential endorsement of statements regarding the relationship between  
494 real and rubber hands (i.e., that they are causally linked, or that the rubber hand is experienced  
495 as one's own). Taken together, these findings are consistent with a predictive coding account of  
496 self-recognition [31], wherein more abstract multimodal self-representations are encoded at  
497 higher levels within a hierarchical model of self-processing. Intermediate-level beliefs are  
498 constrained by top-down expectations as well as sensory bottom-up information lower in the  
499 hierarchy. Thus, during the synchronous stroking, we hypothesize that the prediction error  
500 caused by RHI procedures could be accounted for at the level of a perceptual experience for  
501 healthy participants; whereas in BPD, RHI procedures lead to updating of more abstract self-  
502 representations, and therefore endorsement of causation and ownership illusions (Q2 and Q3,  
503 respectively). Similarly, while asynchronous stroking was sufficient to eradicate the illusion in  
504 HCs, the BPD group maintained an attenuated experience of the illusion (Q1 endorsement)  
505 related to perceptual experience.

506         Lastly, we performed exploratory correlations to assess the relationship between clinical  
507 traits and illusory experience. We hypothesized that psychotic-like experiences would be  
508 uniquely related to RHI illusion strength (H.3). In addition to linking illusion strength  
509 with psychotic-like experiences, we also found strong associations with affective symptoms in  
510 both the BPD group (as measured by the DIB affect subscale) and across the whole sample (as  
511 measured by PID-5 trait negative affect). While the link between psychotic-spectrum experience  
512 and RHI has been demonstrated in other settings (e.g. [19] [13] [13]), we are the first to  
513 demonstrate this association within BPD, providing further evidence that body plasticity may  
514 track psychosis-proneness trans-diagnostically. Finding a link between dissociation and RHI

515 susceptibility in BPD, Bekrater-Bodman et al. [20] posit that altered NMDA neurotransmission  
516 may underlie altered body plasticity in the condition. This suggestion is bolstered by  
517 neurochemical evidence [44] implicating glutamatergic signaling in the anterior cingulate cortex  
518 (ACC) in BPD. Importantly, the ACC and the insular cortex have been identified as central  
519 structures for interoception [35]. Computational perspectives on mood and emotion suggest that  
520 emotional states reflect the certainty (or precision) regarding the interoceptive consequences of  
521 action, such that negative emotion “contextualize events that induce expectations of  
522 unpredictability” ([45], p. 2278). Thus, state negative affect may contribute to overweighting of  
523 exteroceptive input during RHI procedures in the setting of low precision-weighted interoceptive  
524 input. Clarifying the contribution of state, e.g. affect, and trait, e.g. emotion regulation [35],  
525 characteristics to the plasticity of body ownership also may elucidate the relationship between  
526 emotion arousal and clinical states such dissociation and depersonalization associated with  
527 BPD [5]. Alterations in body plasticity may also inform our understanding of interpersonal  
528 difficulties in the condition. BPD is associated with a two-fold increase in preferred interpersonal  
529 distance in live dyadic contexts compared to healthy controls, suggesting alteration in embodied  
530 peri-personal space [21]. Given the theoretical links between interoception, emotion, and theory  
531 of mind [46], targeting body awareness (e.g. through mindfulness practice [47, 48]) may be an  
532 important focus, especially for people with BPD whose symptom profiles are high in self-  
533 disturbance and psychoticism.

534         The findings from this work are best understood within the context of several limitations.  
535 Sample size was small, and subjects were all women. The small sample size prohibits  
536 examination of the impacts of potentially interesting demographics (race, sexual orientation,  
537 age) and co-morbidities on outcome. Inclusion of only biologically female, female-identified  
538 subjects for the study was important to decrease potential sources of variability in results given  
539 the small sample, but does limit generalizability of results. From a task set-up perspective, we  
540 did not include a baseline acclimation period to test for illusion induction from visual stimulus

541 alone prior to tactile stimulation. This has been done in a non-clinical sample [16] and would  
542 enable the direct assessment of the relative contribution of visual capture vs. integration of  
543 visuotactile stimulation in producing enhanced illusory experience in clinical population.  
544 Furthermore, in a computational model, Majed, Chung, & Shams [16], demonstrated that the  
545 perception of body ownership as measured by the RHI can be described as a Bayesian causal  
546 inference. Future research applying this modeling techniques to clinical data can further probe  
547 to what extent increased body plasticity in BPD is driven by weakening of top-down  
548 representations of body-schemas vs bottom-up integration of interoceptive and exteroceptive  
549 input.  
550  
551

552 **Table 1: RHI Questionnaire Items (target items in bold)**

| Item | Wording                                                                                                                |
|------|------------------------------------------------------------------------------------------------------------------------|
| 1    | <b>It seemed as if I were feeling the touch of the paintbrush in the location where I saw the rubber hand touched.</b> |
| 2    | <b>It seemed as though the touch I felt was caused by the paint brush touch the rubber hand.</b>                       |
| 3    | <b>I feel as if the rubber hand were my hand.</b>                                                                      |
| 4    | I felt as if my real hand was drifting toward the rubber hand.                                                         |
| 5    | It seemed as if I might have more than one right hand or arm.                                                          |
| 6    | It seemed as if the touch I was feeling came from somewhere between my own hand and the rubber hand.                   |
| 7    | It felt as if my real hand were turning 'rubbery'.                                                                     |
| 8    | It appeared visually as if the rubber hand was drifting towards my hand.                                               |
| 9    | The rubber hand began to resemble my own real hand, in terms of shape, texture, or some other visual feature.          |

553  
554  
555  
556  
557  
558  
559  
560

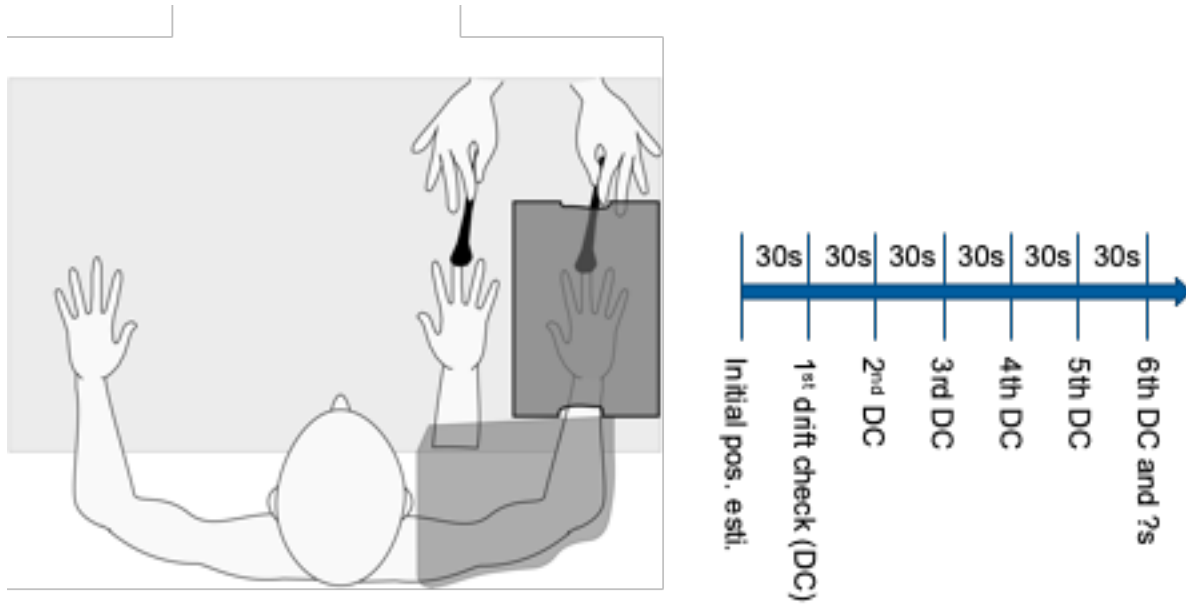

561

562 **Figure 1: Rubber Hand Illusion setup.** Participant's gloved right hand is placed in cardboard  
563 box obstructing it from view. A life-like gloved rubber hand is placed medial to the box. A cloth is  
564 draped across right shoulder, covering the wrist of the rubber hand and the cardboard box  
565 proximally, where the participant's real hand enters. During illusion induction, the participant is  
566 instructed to visually focus on the rubber hand while an experimenter provides brushstrokes to  
567 the middle phalanges of the real hand (through an opening in the cardboard box) and an  
568 equivalent location on the rubber hand for 3 minutes. Hand localization ("drift") estimates are  
569 taken at 30 second intervals. The questionnaire is administered once after each stimulation  
570 condition (synchronous, asynchronous).

571

572

573

574

575

576

577

578

579

580

581

582

583

|                            | <b>BPD</b>    | <b>HC</b>     | <b>Statistics</b>                   |
|----------------------------|---------------|---------------|-------------------------------------|
| <b>n</b>                   | 24            | 21            |                                     |
| <b>Age (yrs)</b>           | 33.17 (12.47) | 31.10 (13.13) | t = 0.54; p = 0.59                  |
| <b>Education (yrs)</b>     | 13.96 (2.46)  | 15.02 (2.45)  | t = -1.45; p = 0.15                 |
| <b><u>Race</u></b>         |               |               | Chi square = 3.19; df = 2; p = 0.74 |
| <b>Asian</b>               | 8.30%         | 9.50%         |                                     |
| <b>Black</b>               | 16.70%        | 28.60%        |                                     |
| <b>Hispanic</b>            | 4.20%         | 19%           |                                     |
| <b>White</b>               | 66.70%        | 42.90%        |                                     |
| <b>Not Reported</b>        | 4.20%         | 0%            |                                     |
|                            |               |               |                                     |
| <b>BAI</b>                 | 24.83 (12.80) | 7.35 (10.05)  | t = 4.92; p < 0.001                 |
| <b>BDI</b>                 | 23.04 (12.71) | 2.52 (4.52)   | t = 7.39; p < 0.001                 |
| <b>DIB-R (unscaled)</b>    | 28.00 (6.55)  | 3.19 (4.17)   | t = 14.90; p < 0.001                |
| <b>SCID-II self report</b> | 9.75 (3.51)   | 0.95 (1.40)   | t = 11.31; p < 0.001                |
| <b>BSL-23</b>              | 36.25 (21.42) | 3.95 (4.32)   | t = 7.219; p < 0.001                |

**Table 2: Participant Characteristics** Mean results are reported followed by standard deviations in parentheses. Groups were matched on age, education, and race. All participants were female. BPD group participants reported significantly more anxiety, depression, and BPD symptoms than did HC participants.

584  
585  
586  
587



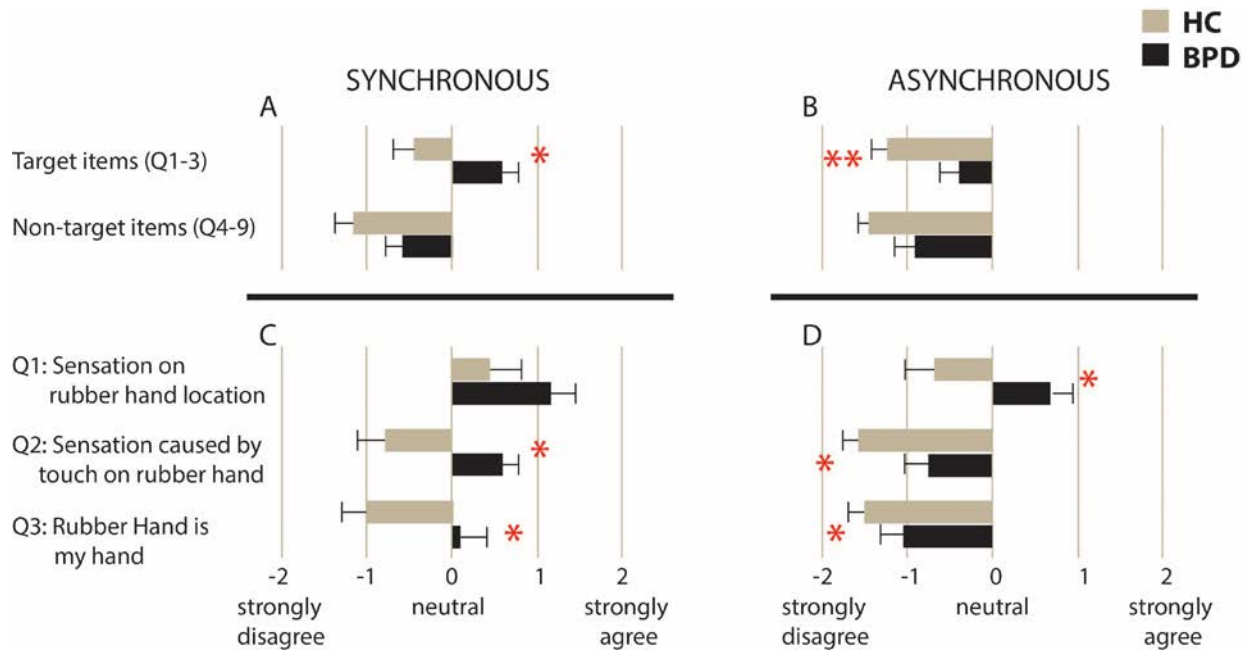

588  
589  
590

591 **Figure 2: RHI Questionnaire Responses.** Averaged mean scores for target and nontarget items  
592 in synchronous (2A) and asynchronous conditions (2B). Error bars denote standard error of the  
593 mean. Means for individual target items are displayed for both synchronous (2C) and  
594 asynchronous (2D) conditions. \* p < 0.05; \*\* p < 0.01

595  
596  
597  
598  
599  
600  
601  
602

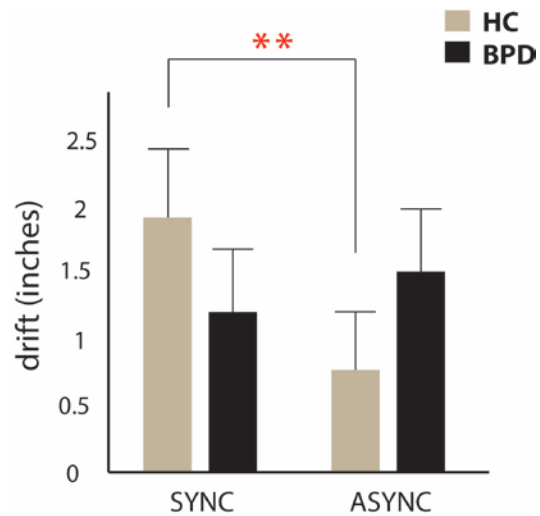

603

604 **Figure 3: Proprioceptive drift.** Mean drift toward rubber hand following six 30 second trials of  
605 synchronous (sync) or asynchronous (async) stimulation. Error bars represent standard error of  
606 the mean. \*\*  $p < 0.01$

607

608

609

610

611

612

613

614

615

616

617

618

619

620

621

622

623

|              | Scale              | (s) Drift | (s) target | (s) Q3 |
|--------------|--------------------|-----------|------------|--------|
| BPD only     | DIB: Total score   | 0.019     | .384*      | .400*  |
|              | DIB: Affect        | 0.092     | .481**     | .680** |
|              | DIB: Cognition     | -0.289    | .411*      | .358*  |
|              | DIB: Impulsivity   | 0.283     | 0.256      | 0.075  |
|              | DIB: Interpersonal | 0.095     | -0.041     | 0.107  |
| Total sample | NegativeAffect     | -0.172    | .309*      | 0.183  |
|              | Detachment         | 0.026     | .368*      | .325*  |
|              | Antagonism         | .335*     | 0.256      | 0.121  |
|              | Disinhibition      | -0.067    | 0.228      | 0.173  |
|              | Psychoticism       | 0.101     | .440**     | .393** |

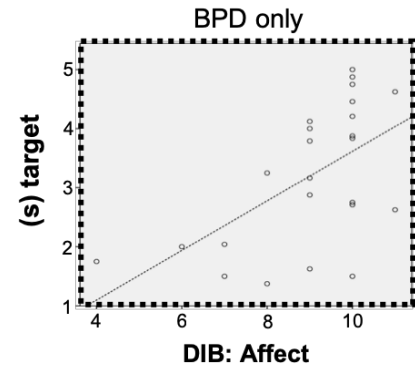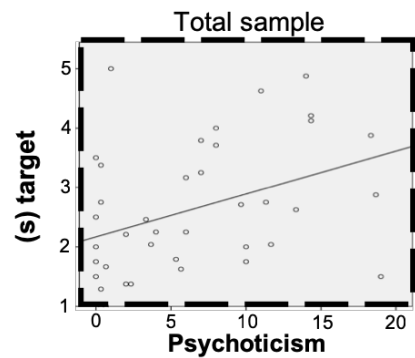

624  
625  
626  
627  
628  
629  
630  
631  
632  
633  
634  
635  
636  
637  
638  
639  
640

**Table 3: Relationship between illusion susceptibility, BPD symptom clusters and maladaptive traits.** The table displays Pearson correlations coefficients between proprioceptive drift, target-item endorsement, item three endorsement in the synchronous condition, and clinical/personality variables. On the right side are the scatterplots for the relationship between average target item endorsement in the synchronous condition and DIB affect in the BPD group (upper panel) and trait psychoticism as measured by PID-5 in the whole sample (lower panel).

\*  $p < 0.05$ , one tailed; \*\*  $p < 0.01$ , one tailed

Note: DIB-R = Diagnostic Interview for Borderlines-revised. DIB-R includes affect, cognition, impulsivity, and interpersonal sub-scales. PID-5 = Personality Inventory for DSM-5 which has scales for the following maladaptive traits: negative affect, detachment, antagonism, disinhibition, and psychoticism. (s) Drift = proprioceptive drift in synchronous condition. (s) targ = average target-item response in synchronous condition. (s) Q3 = response to item 3 on RHI questionnaire in the synchronous condition: "I feel as if the rubber hand were my own."

641  
642  
643  
644  
645  
646

## 647 **Supplement 1: Methods- Recruitment and enrollment**

648 Women aged 18-65 were recruited from the community and local clinics through flyers  
649 and online advertisements. Initial screening was performed over telephone using the BPD  
650 section of the Diagnostic Interview for Personality Disorders [49] and questions to assess for  
651 exclusion criteria. Based on results of the screen, participants were invited to the laboratory and  
652 informed consent was obtained. Participants were then screened in person using the Structured  
653 Interview for DSM-IV [50], and the Revised Diagnostic Interview for Borderlines (DIB-R) [27].  
654 To be enrolled in the study, HCs had no current psychiatric conditions, and BPD participants  
655 had no current substance dependence and no primary psychotic disorder. On DIB-R, enrolled  
656 HCs scored  $\leq 4$  (scaled total), and enrolled BPD participants scored  $\geq 8$  (scaled total). Enrolled  
657 participants had no history of neurologic injury or illness. We also collected information on  
658 participant self-reported race and education level.

659

## 660 **S2: Symptom and self-report scale**

661 The Beck Anxiety Inventory (BAI) is a 21-item self report scale that has established  
662 reliability (Cronbach's alpha 0.94) and validity ( $r = 0.54$  versus diary reports of anxiety) in an  
663 initial psychometric validation study [51, 52]. In our sample, 20 HC subjects and 23 BPD  
664 subjects completed the scale.

665 The Beck Depression Inventory (BDI-II) is a 21-item scale with established reliability  
666 (Cronbach's alpha 0.9) and validity ( $r = 0.71 - 0.86$  versus a range of commonly used  
667 depression scales) in large meta-analysis [53]. In our sample, 21 HC subjects and 23 BPD  
668 subjects completed the scale.

669 The Personality Inventory for DSM-5 (PID-5) is a 220 item self-rated personality trait  
670 scale that assesses personality trait facets. The facets can be grouped into 5 broader trait  
671 domains: Negative Affect, Detachment, Antagonism, Disinhibition, and Psychoticism. Domain  
672 scales have established reliability (Cronbach's alpha ranging from 0.84-0.96 for trait domains)

673 and validity ( $r = 0.44-0.67$ ; median  $r = 0.53$  for each train domain compared to conceptual  
674 counterpart of the Personality Psychopathology Five [25, 54]. In our sample, 18 HC subjects  
675 and 20 BPD subjects completed all trait domain scales. 1 HC subject completed subscales for  
676 antagonism, disinhibition, and psychoticism only.

677 The Structured Clinical Interview for DSM-IV Personality Questionnaire was not initially  
678 designed as a stand-alone instrument, but it has been found to have few false-negatives, and to  
679 be reliable compared to the clinician-administered version [55] [56]. In our sample, 21 HC  
680 subjects and 24 BPD subjects completed this questionnaire.

681 The Revised Diagnostic Interview for Borderlines (DIB-R) [27], is a diagnostic interview  
682 used to diagnose BPD with established internal reliability (e.g. Cronbach's  $\alpha = 0.82$  in an  
683 adolescent sample) [57], and validity (for cutoff of scaled score of 8, the DIB-R had a sensitivity  
684 of 0.82, a specificity of 0.80, compared to clinician-assessed DSM-III diagnostic criteria) [27].  
685 The interview consists of 186 standard questions and 108 scores. Responses are totaled to  
686 score 22 descriptive statements reflecting features of BPD. Scores are then totaled for  
687 diagnostic determination and symptom burden assessment. Symptom burden is additionally  
688 characterized into 4 symptom-cluster subscales: affect, cognition, impulsivity, and interpersonal  
689 relationships. In our sample, 21 HC subjects and 24 BPD subjects completed this questionnaire.

690

691

### 692 **S3: Results- Induction of illusory limb ownership**

693 For each group (HC and BPD), we conducted a 2 x 2 ANOVA test to compare the  
694 effects of condition (synchronous/asynchronous) and item-type (target/non-target) on subjective  
695 endorsement of the item. We found a main effect of condition in both groups, with greater  
696 endorsement after synchronous than asynchronous stimulation (**BPD**:  $F(1,23) = 12.59$ ,  $p <$   
697  $0.005$ , mean score sync = 2.98, SE 0.19, mean score async = 2.31, SE 0.20, **HC**:  $F(1,20) =$   
698  $11.87$ ,  $p < 0.05$ , mean score sync = 2.25, SE = 0.20, mean score async = 1.67, SE 0.17), . We

699 also found a main effect of question type with greater endorsement of target versus non-target  
700 items (**BPD**:  $F(1,23) = 17.60, p < 0.001$ , mean score target = 3.02, SE = 0.18, mean score non-  
701 target = 2.27, SE 0.20, **HC**:  $F(1,20) = 11.13, p < 0.005$ ), mean score target = 2.16, SE = 0.19,  
702 mean score non-target = 1.75, SE 0.16. Taken together, these results suggest that we were  
703 able to successfully induce subjective experience of the RHI in both BPD and HC groups. Also,  
704 the synchronous condition is more illusion-inducing than the asynchronous condition, and the  
705 target items are more strongly endorsed than the non-target items.

706  
707  
708

#### 709 **S4: Results- Relationship between proprioceptive drift and RHI questionnaire**

710 Across groups, there were weak correlations that fell short of statistical significance  
711 between proprioceptive drift and target item endorsement in the synchronous ( $r = 0.20, p =$   
712  $0.099$ , one-tailed) and asynchronous ( $r = 0.22, p = 0.072$ , one-tailed) conditions. While this  
713 relationship was not significant in the HC group, there was a moderate relationship with trend-  
714 level significance in the synchronous condition ( $r = 0.32, p = 0.066$ , one-tailed) and a moderate  
715 statistically significant relationship in the asynchronous condition ( $r = 0.45, p = 0.013$ , one-tailed)  
716 in the BPD group.

717  
718

719 **References**

- 720
- 721 1. Gunderson, J.G., et al., *Borderline personality disorder*. Nature Reviews Disease Primers,  
722 2018. **4**: p. 18029.
  - 723 2. Fuchs, T., *Fragmented Selves: Temporality and Identity in Borderline Personality*  
724 *Disorder*. Psychopathology, 2007. **40**(6): p. 379-387.
  - 725 3. Kerr, I.B., et al., *The 'Self' and Borderline Personality Disorder: Conceptual and Clinical*  
726 *Considerations*. Psychopathology, 2015. **48**(5): p. 339-348.
  - 727 4. Brown, M.Z., K.A. Comtois, and M.M. Linehan, *Reasons for suicide attempts and*  
728 *non-suicidal self-injury in women with borderline personality disorder*. Journal of  
729 Abnormal Psychology, 2002. **111**(1): p. 198-202.
  - 730 5. Korzekwa, M.I., P.F. Dell, and C. Pain, *Dissociation and borderline personality disorder:*  
731 *an update for clinicians*. Curr Psychiatry Rep, 2009. **11**(1): p. 82-8.
  - 732 6. Schmahl, C., et al., *Pain sensitivity is reduced in borderline personality disorder, but not*  
733 *in posttraumatic stress disorder and bulimia nervosa*. The World Journal of Biological  
734 Psychiatry, 2010. **11**(2-2): p. 364-371.
  - 735 7. Loffler, A., J. Foell, and R. Bekrater-Bodmann, *Interoception and Its Interaction with Self,*  
736 *Other, and Emotion Processing: Implications for the Understanding of Psychosocial*  
737 *Deficits in Borderline Personality Disorder*. Current Psychiatry Reports, 2018. **20**(4).
  - 738 8. Tsakiris, M., *The multisensory basis of the self: From body to identity to others*. The  
739 Quarterly Journal of Experimental Psychology, 2017. **70**(4): p. 597-609.
  - 740 9. Seth, A.K., *Interoceptive inference, emotion, and the embodied self*. Trends in Cognitive  
741 Sciences, 2013. **17**(11): p. 565-573.
  - 742 10. Botvinick, M. and J. Cohen, *Rubber hands 'feel' touch that eyes see*. Nature, 1998.  
743 **391**(6669): p. 756-756.
  - 744 11. Thakkar, K.N., et al., *Disturbances in Body Ownership in Schizophrenia: Evidence from the*  
745 *Rubber Hand Illusion and Case Study of a Spontaneous Out-of-Body Experience*. PLOS  
746 ONE, 2011. **6**(10): p. e27089.
  - 747 12. Holmes, N.P. and C. Spence, *The body schema and multisensory representation(s) of*  
748 *peripersonal space*. Cognitive Processing, 2004. **5**(2): p. 94-105.
  - 749 13. Moore, J.W., et al., *Ketamine administration in healthy volunteers reproduces aberrant*  
750 *agency experiences associated with schizophrenia*. Cogn Neuropsychiatry, 2011: p. 1-18.
  - 751 14. Costantini, M. and P. Haggard, *The rubber hand illusion: Sensitivity and reference frame*  
752 *for body ownership*. Consciousness and Cognition, 2007. **16**(2): p. 229-240.
  - 753 15. Eshkevari, E., et al., *Increased plasticity of the bodily self in eating disorders*.  
754 Psychological Medicine, 2012. **42**(4): p. 819-828.
  - 755 16. Samad, M., A.J. Chung, and L. Shams, *Perception of Body Ownership Is Driven by*  
756 *Bayesian Sensory Inference*. PLOS ONE, 2015. **10**(2): p. e0117178.
  - 757 17. Kaplan, R.A., et al., *Is Body Dysmorphic Disorder Associated with Abnormal Bodily Self-*  
758 *Awareness? A Study Using the Rubber Hand Illusion*. PLOS ONE, 2014. **9**(6): p. e99981.
  - 759 18. Keizer, A., et al., *Does the experience of ownership over a rubber hand change body size*  
760 *perception in anorexia nervosa patients?* Neuropsychologia, 2014. **62**: p. 26-37.
  - 761 19. Asai, T., et al., *Rubber hand illusion, empathy, and schizotypal experiences in terms of*  
762 *self-other representations*. Consciousness and Cognition, 2011. **20**(4): p. 1744-1750.

- 763 20. Bekrater-Bodmann, R., et al., *Body plasticity in borderline personality disorder: A link to*  
764 *dissociation*. *Comprehensive Psychiatry*, 2016. **69**: p. 36-44.
- 765 21. Fineberg, S.K., et al., *Individuals with Borderline Personality Disorder show larger*  
766 *preferred social distance in live dyadic interactions*. *Psychiatry Research*, 2018. **260**: p.  
767 384-390.
- 768 22. Fineberg, S.K., et al., *Differential Valuation and Learning From Social and Nonsocial Cues*  
769 *in Borderline Personality Disorder*. *Biological Psychiatry*, 2018. **84**(11): p. 838-845.
- 770 23. Beck, A.T., et al., *An inventory for measuring clinical anxiety: psychometric properties*. *J*  
771 *Consult Clin Psychol*, 1988. **56**(6): p. 893-7.
- 772 24. Beck, A.T., R.A. Steer, and G.K. Brown, *Beck depression inventory-II*. San Antonio, 1996.  
773 **78**(2): p. 490-498.
- 774 25. Krueger, R.F., et al., *Initial construction of a maladaptive personality trait model and*  
775 *inventory for DSM-5*. *Psychological Medicine*, 2012. **42**(9): p. 1879-1890.
- 776 26. Ekselius, L., et al., *A Principal Component Analysis of the DSM-III-R Axis II Personality*  
777 *Disorders*. *Journal of Personality Disorders*, 1994. **8**(2): p. 140-148.
- 778 27. Zanarini, M.C., et al., *The Revised Diagnostic Interview for Borderlines: Discriminating*  
779 *BPD from other Axis II Disorders*. *Journal of Personality Disorders*, 1989. **3**(1): p. 10-18.
- 780 28. Smit, M., et al., *Laterality and body ownership: Effect of handedness on experience of the*  
781 *rubber hand illusion*. *Laterality: Asymmetries of Body, Brain and Cognition*, 2017. **22**(6):  
782 p. 703-724.
- 783 29. Schütz-Bosbach, S., P. Tausche, and C. Weiss, *Roughness perception during the rubber*  
784 *hand illusion*. *Brain and Cognition*, 2009. **70**(1): p. 136-144.
- 785 30. George, D. and P. Mallery, *SPSS® for Windows® step by step: A simple guide and*  
786 *reference*. 1999: Allyn & Bacon.
- 787 31. Apps, M.A.J. and M. Tsakiris, *The free-energy self: A predictive coding account of self-*  
788 *recognition*. *Neuroscience & Biobehavioral Reviews*, 2014. **41**: p. 85-97.
- 789 32. Palmer, C.E. and M. Tsakiris, *Going at the heart of social cognition: is there a role for*  
790 *interoception in self-other distinction?* *Current Opinion in Psychology*, 2018. **24**: p. 21-26.
- 791 33. Fotopoulou, A. and M. Tsakiris, *Mentalizing homeostasis: The social origins of*  
792 *interoceptive inference*. *Neuropsychanalysis*, 2017. **19**(1): p. 3-28.
- 793 34. Tajadura-Jiménez, A. and M. Tsakiris, *Balancing the “inner” and the “outer” self:*  
794 *Interoceptive sensitivity modulates self–other boundaries*. *Journal of Experimental*  
795 *Psychology: General*, 2014. **143**(2): p. 736-744.
- 796 35. Müller, L.E., et al., *Cortical Representation of Afferent Bodily Signals in Borderline*  
797 *Personality Disorder: Neural Correlates and Relationship to Emotional*  
798 *Dysregulation* *Afferent Bodily Signals in Borderline Personality Disorder* *Afferent Bodily*  
799 *Signals in Borderline Personality Disorder*. *JAMA Psychiatry*, 2015. **72**(11): p. 1077-1086.
- 800 36. Khalsa, S.S., et al., *Interoception and Mental Health: A Roadmap*. *Biological Psychiatry:*  
801 *Cognitive Neuroscience and Neuroimaging*, 2018. **3**(6): p. 501-513.
- 802 37. Tsakiris, M., A. Tajadura-Jimenez, and M. Costantini, *Just a heartbeat away from one's*  
803 *body: interoceptive sensitivity predicts malleability of body-representations*. *Proceedings*  
804 *of the Royal Society B-Biological Sciences*, 2011. **278**(1717): p. 2470-2476.



- 805 38. Ring, C., et al., *Effects of heartbeat feedback on beliefs about heart rate and heartbeat*  
806 *counting: A cautionary tale about interoceptive awareness*. *Biological Psychology*, 2015.  
807 **104**: p. 193-198.
- 808 39. Rosenvinge, J.H., M. Martinussen, and E. Østensen, *The comorbidity of eating disorders*  
809 *and personality disorders: A metaanalytic review of studies published between 1983 and*  
810 *1998*. *Eating and Weight Disorders - Studies on Anorexia, Bulimia and Obesity*, 2000.  
811 **5**(2): p. 52-61.
- 812 40. Sansone, R.A., J.W. Chu, and M.W. Wiederman, *Body image and borderline personality*  
813 *disorder among psychiatric inpatients*. *Comprehensive Psychiatry*, 2010. **51**(6): p. 579-  
814 584.
- 815 41. Tsakiris, M. and P. Haggard, *The Rubber Hand Illusion Revisited: Visuotactile Integration*  
816 *and Self-Attribution*. *Journal of Experimental Psychology: Human Perception and*  
817 *Performance*, 2005. **31**(1): p. 80-91.
- 818 42. Kammers, M.P.M., et al., *The rubber hand illusion in action*. *Neuropsychologia*, 2009.  
819 **47**(1): p. 204-211.
- 820 43. Rohde, M., M. Di Luca, and M.O. Ernst, *The Rubber Hand Illusion: Feeling of Ownership*  
821 *and Proprioceptive Drift Do Not Go Hand in Hand*. *PLOS ONE*, 2011. **6**(6): p. e21659.
- 822 44. Hoerst, M., et al., *Correlation of Glutamate Levels in the Anterior Cingulate Cortex With*  
823 *Self-reported Impulsivity in Patients With Borderline Personality Disorder and Healthy*  
824 *Controls* ACC Glutamate Levels and Self-Reported Impulsivity. *Archives of General*  
825 *Psychiatry*, 2010. **67**(9): p. 946-954.
- 826 45. Clark, J.E., S. Watson, and K.J. Friston, *What is mood? A computational perspective*.  
827 *Psychological Medicine*, 2018. **48**(14): p. 2277-2284.
- 828 46. Ondobaka, S., J. Kilner, and K. Friston, *The role of interoceptive inference in theory of*  
829 *mind*. *Brain and Cognition*, 2017. **112**: p. 64-68.
- 830 47. Farb, N.A.S., Z.V. Segal, and A.K. Anderson, *Mindfulness meditation training alters*  
831 *cortical representations of interoceptive attention*. *Social Cognitive and Affective*  
832 *Neuroscience*, 2012. **8**(1): p. 15-26.
- 833 48. Bornemann, B., et al., *Differential changes in self-reported aspects of interoceptive*  
834 *awareness through 3 months of contemplative training*. *Frontiers in Psychology*, 2015.  
835 **5**(1504).
- 836 49. Zanarini, M.C., et al., *The diagnostic interview for DSM-IV personality disorders (DIPD-*  
837 *IV)*. Belmont, MA: McLean Hospital, 1996. **340**.
- 838 50. First, M.B., et al., *Structured clinical interview for DSM-IV-TR axis I disorders, clinical*  
839 *trials version (SCID-CT)*. New York: Biometrics Research, New York State Psychiatric  
840 Institute, 2007.
- 841 51. Fydrich, T., D. Dowdall, and D.L. Chambless, *Reliability and validity of the beck anxiety*  
842 *inventory*. *Journal of Anxiety Disorders*, 1992. **6**(1): p. 55-61.
- 843 52. Beck, A.T., et al., *An inventory for measuring clinical anxiety: Psychometric properties*.  
844 *Journal of Consulting and Clinical Psychology*, 1988. **56**(6): p. 893-897.
- 845 53. Wang, Y.-P. and C. Gorenstein, *Psychometric properties of the Beck Depression*  
846 *Inventory-II: a comprehensive review*. *Brazilian Journal of Psychiatry*, 2013. **35**: p. 416-  
847 431.

- 848 54. Anderson, J.L., et al., *On the Convergence Between PSY-5 Domains and PID-5 Domains*  
849 *and Facets: Implications for Assessment of DSM-5 Personality Traits*. *Assessment*, 2013.  
850 **20**(3): p. 286-294.
- 851 55. Ekselius, L., et al., *SCID II interviews and the SCID Screen questionnaire as diagnostic*  
852 *tools for personality disorders in DSM-III-R*. *Acta Psychiatrica Scandinavica*, 1994. **90**(2):  
853 p. 120-123.
- 854 56. Jacobsberg, L., S. Perry, and A. Frances, *Diagnostic Agreement Between the SCID-II*  
855 *Screening Questionnaire and the Personality Disorder Examination*. *Journal of*  
856 *Personality Assessment*, 1995. **65**(3): p. 428-433.
- 857 57. Chabrol, H., et al., *Factor Analyses of The DIB-R in Adolescents*. *Journal of Personality*  
858 *Disorders*, 2002. **16**(4): p. 374-384.  
859  
860
